# Supplementary material
Source: Springer Nature journal article supplement (https://www.springermedizin.de/resource/supplementary/13063_2013_1928_MOESM2_ESM.pdf/9621690)
Supplement: MOESM2 [file 9621690]

Patient  
Engagement

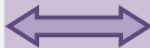

Primary Care  
Provider  
Engagement

Promote Self-  
Management

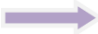

Optimise Treatment

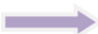

Co-ordinate Care

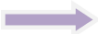

Chronic  
Disease  
Management

Effective Telehealth  
Delivered by NHS Direct

Care Delivered by Primary  
Care

Care Delivered by Other  
Health Care Providers

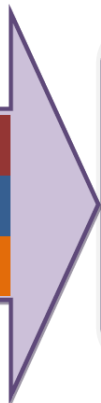

Improved  
outcomes:

Health outcomes  
Access to care  
Patient experience  
Cost-effectiveness

Wider social and  
health system  
context
